# Supplementary material for: Species and Population Level Molecular Profiling Reveals Cryptic Recombination and Emergent Asymmetry in the Dimorphic Mating Locus of C. reinhardtii
Source: PubMed Central journal article supplement (PMC3757049; doi:10.1371/journal.pgen.1003724), 2013-08-29

A.

```

Plus 1 CCATCACCGCTACAGTATAGCATTCAGTTTGCTGTGTAGGTTCATGCTGACACACTGTAATTCTGCCTTCGCGTTGGATTTCGCAATAATTCTTTTCGGTCTCACTG
Minus 1 CCATCACCGC----TATAGCATTCAGTTTGCTGTGTAGGTTCATGCTGACACACTGTCATTCTGCCTTCGCGTTGGATCTCGCAATAATTCTTTTCGGTCTCACTG

Plus 106 GACGCGCTGATTCGGTCGTTTCTTCCCCTTCCGAGCCTGCAAACTGAGTTCATACTGCTGGCATATAGGAAGTGCATACAGCGACGCAAAGCGAGCCCGAGCTAG
Minus 101 GACGCGCTGATTTGGTCGTTTCTTCCCCTTCCGAGCCTGCAAACTGAGTTCATACTGCTGGCATATAGGAAGTGCATACAGCGACGCAAAGCGAGCCCGAGCTAG

Plus 211 GCGGCACCCAAGTTTGGCAACCAGGGCGCCCGTGGGCAAGGACGGCCCAACAAACTTAAATGGCTCGCCCGGAAGATGAGCCCGAGAGGgtgaggtccgggctcat
Minus 206 GCGGCACCCAAGTTTGGCAACCAGGGCGCCCGTGGGCAAGGACGGCCCAACAAACTTAAATGGCTCGCCCGGAAGATGAGCCCGAGAGGgtgaggtccgggctcat

Plus 316 gtgtcgcgcggaagtctcagggcgtcaaaatagggcataagagccgaacgccgtcgtaagcgagttctct-----cgtttggtgacgtgtgg
Minus 311 gtgtcgcgcggaagtctcagggcgtcaaaatagggcataagagccgaacgccgtcgtaagcgagttctcttggggaatgctccattgcatttggtgacgtgtgg

Plus 404 ccacattgaatgtggcgccaccagccttgtcgcacgggcggttcccgtttgatggtacatggtgccc-----cagGCGCGGGAGGCGGAGGCCGACGCTGAAG
Minus 416 ccacattgaatgtggcgccaccagccttgtcgcacgggcggttcccgtttgatggtacatggtgccccgcgctcagGCGCGGGAGGCGGAGGCCGACGCTGAAG

```

B.

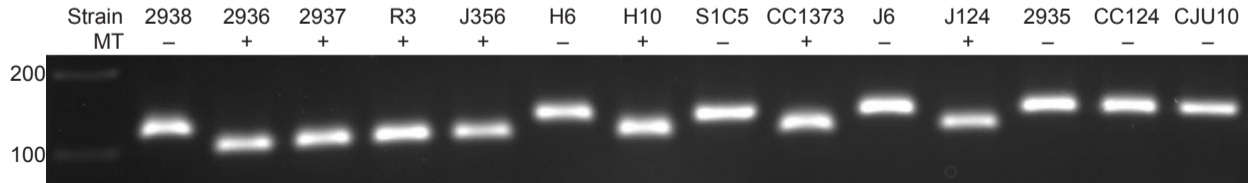

Supplement: pgen.1003724.s002.pdf [file pgen.1003724.s002.pdf]
