# Supplementary material for: Species and Population Level Molecular Profiling Reveals Cryptic Recombination and Emergent Asymmetry in the Dimorphic Mating Locus of C. reinhardtii
Source: PubMed Central journal article supplement (PMC3757049; doi:10.1371/journal.pgen.1003724), 2013-08-29

**A**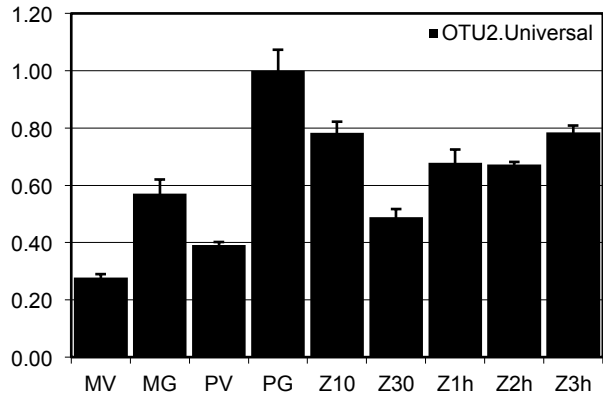**B**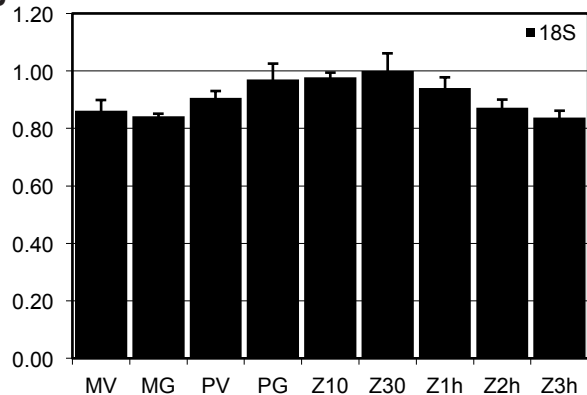**C**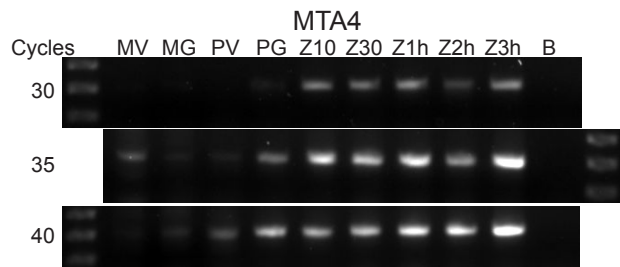**D**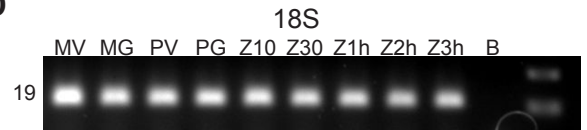

Supplement: pgen.1003724.s004.pdf [file pgen.1003724.s004.pdf]
