# Supplementary material for: Species and Population Level Molecular Profiling Reveals Cryptic Recombination and Emergent Asymmetry in the Dimorphic Mating Locus of C. reinhardtii
Source: PubMed Central journal article supplement (PMC3757049; doi:10.1371/journal.pgen.1003724), 2013-08-29
Supplement: pgen.1003724.s007.pdf [file pgen.1003724.s007.pdf]

**TABLE S1****Locations and predicted protein IDs of duplicated *MT+* genes and their autosomal counterparts.**

| <i>MT</i> Gene |            |                            | Autosomal Gene |                               |
|----------------|------------|----------------------------|----------------|-------------------------------|
| Model Name     | JGI v4 PID | Location                   | JGI v4 PID     | Location                      |
| MTP0428        | 167487     | Chromosome_6:428272-432213 | 294656         | Chromosome_6:202103-206447    |
| MTP0428        | 167487     | Chromosome_6:428272-432213 | 522812         | Chromosome_6:87314-88538      |
| MTP0428        | 167487     | Chromosome_6:428272-432213 | 522811         | Chromosome_6:92118-93458      |
| MTA5           | 522877     | Chromosome_6:546710-551888 | 396153         | Chromosome_16:2929948-2945527 |
| MTA4           | 7933       | Chromosome_6:551994-560141 | 185335         | Chromosome_16:2945860-2953729 |
| psMTA2         | 305935     | Chromosome_6:561462-562582 | 195673         | Chromosome_16:2954391-2957164 |
| MTA1           | 195674     | Chromosome_6:562980-564042 | ND             | ND                            |
| MTA3           | 195822     | Chromosome_6:567034-569191 | 185334         | Chromosome_16:2958242-2960432 |
| 294708         | 294708     | Chromosome_6:577663-578485 | 152340         | Chromosome_16:2961105-2966438 |
| SRLa           | None       | Chromosome_6:821696-824156 | 168182         | Chromosome_10:5383680-5385785 |
| SRLb           | None       | Chromosome_6:815243-821387 | 168182         | Chromosome_10:5385782-5388233 |
| SRLc           | None       | Chromosome_6:798573-799852 | 168182         | Chromosome_10:5388224-5389295 |

The JGI v4 *C. reinhardtii* genome is the basis for the gene coordinates. PID: Protein Identification Number from the V4 genome assembly models. ps: pseudogene.
