# Supplementary material for: Species and Population Level Molecular Profiling Reveals Cryptic Recombination and Emergent Asymmetry in the Dimorphic Mating Locus of C. reinhardtii
Source: PubMed Central journal article supplement (PMC3757049; doi:10.1371/journal.pgen.1003724), 2013-08-29
Supplement: pgen.1003724.s008.pdf [file pgen.1003724.s008.pdf]

TABLE S2

Divergence between duplicated *MT+* genes and their autosomal counterparts

| <i>MT+</i><br>Gene    | Autosomal<br>Paralog | Alignment<br>Region | Alignment<br>Length | Gaps | Total Gap<br>Length | Substitutions | Divergence |        | Codon Substitution Rate |        |        |        |       |
|-----------------------|----------------------|---------------------|---------------------|------|---------------------|---------------|------------|--------|-------------------------|--------|--------|--------|-------|
|                       |                      |                     |                     |      |                     |               | Score      | SE     | dN                      | SE     | dS     | SE     | dN/dS |
| <b>MTP0428 Region</b> |                      |                     |                     |      |                     |               |            |        |                         |        |        |        |       |
| MTP0428               | 294656               | Intergenic          | 788                 | 7    | 462                 | 33            | 0.1100     | 0.0188 | 0.0443                  | 0.0045 | 0.065  | 0.0091 | 0.682 |
|                       |                      | CDS                 | 3213                | 17   | 99                  | 150           | 0.0501     | 0.0045 |                         |        |        |        |       |
|                       |                      | Intron              | 703                 | 8    | 43                  | 33            | 0.0519     | 0.0084 |                         |        |        |        |       |
| <b>MTA Region</b>     |                      |                     |                     |      |                     |               |            |        |                         |        |        |        |       |
| MTA5                  | 396153               | CDS                 | 1494                | 1    | 1500                | 39            | 0.0268     | 0.0039 | 0.0123                  | 0.0033 | 0.0766 | 0.016  | 0.161 |
|                       |                      | Intron              | 984                 | 11   | 37                  | 75            | 0.0844     | 0.0093 |                         |        |        |        |       |
| MTA4                  | 185335               | Intergenic          | 468                 | 5    | 54                  | 24            | 0.0605     | 0.0117 | 0.0058                  | 0.0024 | 0.0991 | 0.0243 | 0.059 |
|                       |                      | CDS                 | 2643                | 5    | 32                  | 49            | 0.0191     | 0.0026 |                         |        |        |        |       |
|                       |                      | Intron              | 5220                | 38   | 564                 | 343           | 0.0780     | 0.0046 |                         |        |        |        |       |
| psMTA2                | 195673               | Intergenic          | 1724                | 7    | 174                 | 58            | 0.0385     | 0.0054 | 0.0186                  | 0.0058 | 0.0302 | 0.0089 | 0.616 |
|                       |                      | CDS                 | 1011                | 1    | 7                   | 22            | 0.0223     | 0.0048 |                         |        |        |        |       |
|                       |                      | Intron              | 169                 | 1    | 8                   | 5             | 0.0318     | 0.0149 |                         |        |        |        |       |
| MTA3                  | 185334               | Intergenic          | 3672                | 20   | 1923                | 102           | 0.0609     | 0.0061 | 0.0055                  | 0.0039 | 0.0267 | 0.0155 | 0.206 |
|                       |                      | CDS                 | 501                 | 1    | 15                  | 5             | 0.0104     | 0.0047 |                         |        |        |        |       |
|                       |                      | Intron              | 358                 | 4    | 41                  | 14            | 0.0456     | 0.0116 |                         |        |        |        |       |
| 294708                | 152340               | Intergenic          | 9628                | 22   | 7834                | 93            | 0.0540     | 0.0059 | 0.0131                  | 0.0093 | 0      | 0      | ND    |
|                       |                      | CDS                 | 185                 | 0    | 0                   | 3             | 0.0165     | 0.0091 |                         |        |        |        |       |
|                       |                      | Intron              | 164                 | 0    | 0                   | 3             | 0.0186     | 0.0106 |                         |        |        |        |       |
| <b>SRL Region</b>     |                      |                     |                     |      |                     |               |            |        |                         |        |        |        |       |
| SRLc                  | 168182               | CDS                 | 720                 | 1    | 6                   | 22            | 0.0316     | 0.0068 | 0.0261                  | 0.0073 | 0.0361 | 0.0139 | 0.723 |
|                       |                      | Intron              | 481                 | 5    | 44                  | 26            | 0.0625     | 0.0117 |                         |        |        |        |       |
| SRLb                  | 168182               | CDS                 | 1049                | 2    | 4                   | 35            | 0.0344     | 0.0057 | 0.0167                  | 0.0068 | 0.0438 | 0.0182 | 0.381 |
|                       |                      | Intron              | 1398                | 3    | 11                  | 79            | 0.0596     | 0.0066 |                         |        |        |        |       |
| SRLa                  | 168182               | CDS                 | 1528                | 1    | 18                  | 43            | 0.0292     | 0.0045 | 0.0173                  | 0.0039 | 0.0588 | 0.0119 | 0.294 |
|                       |                      | Intron              | 327                 | 4    | 8                   | 27            | 0.0908     | 0.0185 |                         |        |        |        |       |

Alignments of cDNAs and genomic DNAs were used to define the intergenic and intronic DNA sequences. CDS: coding sequence. Intron: non-coding sequence between the start and stop codons of the CDS. Intergenic: Non-coding sequence outside of the CDS. Divergence scores determined as per[77]. Codon substitution rates were determined as per[71]. SE is the Standard Error. ND: Not determined
