# Supplementary material for: Species and Population Level Molecular Profiling Reveals Cryptic Recombination and Emergent Asymmetry in the Dimorphic Mating Locus of C. reinhardtii
Source: PubMed Central journal article supplement (PMC3757049; doi:10.1371/journal.pgen.1003724), 2013-08-29
Supplement: pgen.1003724.s009.pdf [file pgen.1003724.s009.pdf]

**TABLE S3**

**Codon adaptive indices (CAI) of  
translocated *MT+* genes and their  
autosomal paralogs**

| <b>Name</b> | <b>Location</b> | <b>Length</b> | <b>CAI</b> |
|-------------|-----------------|---------------|------------|
| 152340      | A               | 183           | 0.731      |
| 294708      | M               | 183           | 0.731      |
| 185334      | A               | 498           | 0.505      |
| MTA3        | M               | 483           | 0.489      |
| 195673      | A               | 960           | 0.535      |
| psMTA2      | M               | 960           | 0.532      |
| 185335      | A               | 1245          | 0.740      |
| MTA4        | M               | 1239          | 0.743      |
| 396153      | A               | 1491          | 0.649      |
| MTA5        | M               | 1485          | 0.649      |
| 294656      | A               | 3174          | 0.573      |
| MTP0428     | M               | 3147          | 0.549      |
| SRR16a      | A               | 1527          | 0.566      |
| SRLa        | M               | 1509          | 0.571      |
| SRR16b      | A               | 1044          | 0.518      |
| SRLb        | M               | 1047          | 0.557      |
| SRR16c      | A               | 717           | 0.575      |
| SRLc        | M               | 711           | 0.573      |

A: Autosome, M: Mating Type Locus, ps:  
pseudogene
