# Supplementary material for: Species and Population Level Molecular Profiling Reveals Cryptic Recombination and Emergent Asymmetry in the Dimorphic Mating Locus of C. reinhardtii
Source: PubMed Central journal article supplement (PMC3757049; doi:10.1371/journal.pgen.1003724), 2013-08-29
Supplement: pgen.1003724.s010.pdf [file pgen.1003724.s010.pdf]

**TABLE S4**  
**Annotations for the *C. reinhardtii* mating locus genes**

| MT+ gene                 | MT+ Start | MT+ Stop | MT+ Strand | MT- Gene | MT- Start* | MT- Stop* | MT- Strand | JGI MT+ (V4) Protein ID |                            | Augustus v10.2     |          | Domain                                                                                                                                                                                                                                                                                      | Annotation |
|--------------------------|-----------|----------|------------|----------|------------|-----------|------------|-------------------------|----------------------------|--------------------|----------|---------------------------------------------------------------------------------------------------------------------------------------------------------------------------------------------------------------------------------------------------------------------------------------------|------------|
|                          |           |          |            |          |            |           |            | or Augustus v5 ID*      | JGI MT+ (V4) Location      | Model ID           | Model ID |                                                                                                                                                                                                                                                                                             |            |
| <b>Shared Genes</b>      |           |          |            |          |            |           |            |                         |                            |                    |          |                                                                                                                                                                                                                                                                                             |            |
| NIC7                     | 339575    | 346160   | -          | NIC7     | 39983      | 47119     | -          | 522848                  | chromosome_6:339304-346672 | Cre06.g251450.t1.2 | T        | Quinolinate synthetase A                                                                                                                                                                                                                                                                    |            |
| SPS1                     | 346944    | 350043   | +          | SPS1     | 47524      | 50742     | +          | 206416                  | chromosome_6:346944-350043 | Cre06.g251500.t1.1 | T        | Spermine synthase                                                                                                                                                                                                                                                                           |            |
| SPP3                     | 350573    | 353784   | -          | SPP1C    | 54194      | 58754     | -          | 196107                  | chromosome_6:350536-355861 | Cre06.g251550.t1.2 | T        | SppA, protease IV, signal peptide peptidase, serine endopeptidase of S49 family (ClpP clan)1                                                                                                                                                                                                |            |
| EIF5Bb                   | 358313    | 361792   | +          | EIF5Bb   | 61516      | 65003     | +          | 206391                  | chromosome_6:358313-362377 | Cre06.g251600.t1.1 | T        | Eukaryotic translation initiation factor eIF5-like, eIF2 epsilon-like; Putative low-affinity phosphate transporter, similar to yeast Pho87, Pho90 & Pho91 transporters involved in activation of the PHO pathway. Contains an N-terminal SPX domain and a C-terminal SLC13 permease domain. |            |
| PTC1                     | 362764    | 372516   | -          | PTC1     | 66675      | 74040     | +          | 196076                  | chromosome_6:362753-373273 | Cre06.g251650.t1.2 | T        | Protein of Unknown Function                                                                                                                                                                                                                                                                 |            |
| 182394                   | 374956    | 375825   | +          | 182394   | 78390      | 78788     | -          | 182394                  | chromosome_6:374753-376959 | Cre06.g251700.t1.1 | T        | Protein of Unknown Function                                                                                                                                                                                                                                                                 |            |
| 97782                    | 379597    | 380211   | +          | 97782    | 81015      | 81629     | -          | 97782                   | chromosome_6:379597-380210 | Cre06.g251750.t1.1 | T        | Protein of Unknown Function                                                                                                                                                                                                                                                                 |            |
| RFC4                     | 381303    | 384361   | -          | RFC4     | 83198      | 86315     | -          | 195837                  | chromosome_6:381041-385068 | Cre06.g251800.t1.1 | T        | Homologous to eukaryotic RFC4 (DNA replication factor C complex subunit 4); accessory protein of DNA polymerase                                                                                                                                                                             |            |
| 182392                   | 385245    | 386007   | +          | 182392   | 86973      | 87519     | +          | 182392                  | chromosome_6:385179-386977 | Cre06.g251850.t1.1 | T        | Protein of Unknown Function                                                                                                                                                                                                                                                                 |            |
| ALB3                     | 387192    | 389979   | +          | ALB3     | 88680      | 91451     | +          | 187295                  | chromosome_6:387003-390870 | Cre06.g251900.t1.1 | T        | One (of two) proteins related to the Arabidopsis ALBINO3 protein. This protein is the product of the AC29 gene [PMID: 8647391]. Alb3 is a chloroplast protein required for the integration of the light harvesting complex protein into the thylakoid membrane [PMID: 12215522]             |            |
| PSF2                     | 392335    | 397177   | -          | PSF2     | 94067      | 98926     | -          | 522858                  | chromosome_6:392283-397491 | Cre06.g251950.t1.2 | T        | Protein of Unknown Function                                                                                                                                                                                                                                                                 |            |
| 182390                   | 397698    | 400153   | +          | 182390   | 99184      | 101644    | +          | 182390                  | chromosome_6:397585-400661 | Cre06.g252000.t1.1 | T        | Flagellar Associated Protein; found in the flagellar proteome [PMID: 15998802] Homolog to <i>H. sapiens</i> LZTFL1 (GenBank ID: AAH25988.1) Regulates the BBSome and may be a tumor suppressor                                                                                              |            |
| 182389                   | 401180    | 401794   | -          | 182389   | 103532     | 104146    | -          | 182389                  | chromosome_6:401009-402507 | Cre06.g252050.t1.1 | T        | Protein of Unknown Function                                                                                                                                                                                                                                                                 |            |
| 294687                   | 403265    | 412912   | -          | 294687   | 105065     | 114642    | -          | 522861                  | chromosome_6:403265-412912 | Cre06.g252100.t1.1 | T        | Protein of Unknown Function                                                                                                                                                                                                                                                                 |            |
| HDH1                     | 414358    | 417535   | -          | HDH1     | 116631     | 119812    | -          | 196269                  | chromosome_6:414358-418076 | Cre06.g252150.t1.1 | T        | Haloacid dehalogenase-like hydrolase                                                                                                                                                                                                                                                        |            |
| TOC34                    | 418285    | 421961   | +          | TOC34    | 120020     | 123826    | +          | 187290                  | chromosome_6:418211-422361 | Cre06.g252200.t1.1 | T        | Similar to the higher plant chloroplast outer envelope protein involved in protein import. Also called IAP34 and OEP34.                                                                                                                                                                     |            |
| PDK1                     | 432790    | 436759   | -          | PDK1     | 175950     | 179760    | -          | 196270                  | chromosome_6:432547-437537 | Cre06.g252300.t1.1 | R        | Putative pyruvate dehydrogenase kinase                                                                                                                                                                                                                                                      |            |
| CGL70                    | 437858    | 440531   | +          | CGL70    | 180755     | 183180    | +          | 196285                  | chromosome_6:437858-440531 | Cre06.g252350.t1.1 | R        | Conserved protein of unknown function                                                                                                                                                                                                                                                       |            |
| NMDA1                    | 441854    | 442918   | -          | NMDA1    | 199058     | 200122    | -          | 182385                  | chromosome_6:441396-443425 | Cre06.g252400.t1.1 | R        | Conserved protein of unknown function                                                                                                                                                                                                                                                       |            |
| DRG1                     | 443823    | 446968   | +          | DRG1     | 200980     | 204132    | +          | 167482                  | chromosome_6:443823-448018 | Cre06.g252450.t1.2 | R        | Highly conserved GTP binding protein of unknown function. The developmentally regulated GTP-binding protein (DRG) subfamily is an uncharacterized member of the Obg family, an evolutionary branch of GTPase superfamily proteins.                                                          |            |
| DLA3                     | 452915    | 456484   | -          | DLA3     | 288913     | 292126    | -          | 187285                  | chromosome_6:452879-456728 | Cre06.g252550.t1.2 | R        | Dihydroliipoamide acetyltransferase; E2 component of pyruvate dehydrogenase complex.                                                                                                                                                                                                        |            |
| 522872                   | 464198    | 466309   | +          | 522872   | 299691     | 302946    | +          | 522872                  | chromosome_6:464198-466309 | Cre06.g252600.t1.2 | R        | Protein of Unknown Function                                                                                                                                                                                                                                                                 |            |
| LEU1S                    | 470915    | 472682   | -          | LEU1S    | 317412     | 319190    | -          | 126865                  | chromosome_6:470849-473034 | Cre06.g252650.t1.1 | R        | Isopropylmalate dehydratase (EC 4.2.1.33); small subunit, involved in leucine biosynthesis.                                                                                                                                                                                                 |            |
| SPL2                     | 473720    | 476297   | -          | SPL2     | 321379     | 322919    | -          | 196072                  | chromosome_6:473527-477186 | Cre06.g252700.t1.1 | R        | Similar to splicing factor 3a, subunit 2                                                                                                                                                                                                                                                    |            |
| LPS1                     | 495674    | 532121   | -          | LPS1     | 139144     | 171097    | +          | None                    | chromosome_6:495674-532121 | None               | R        | Lipase domain protein. Gene model described under Genbank IDs:GU814014 & GU814015                                                                                                                                                                                                           |            |
| 522875                   | 533457    | 536564   | +          | 522875   | 135192     | 137781    | -          | 522875                  | chromosome_6:533160-536919 | Cre06.g252850.t1.1 | R        | Protein of Unknown Function. Contains partial eIF4B domain                                                                                                                                                                                                                                  |            |
| PKY1                     | 583784    | 594373   | -          | PKY1     | 260896     | 269217    | +          | 522883                  | chromosome_6:583784-594373 | Cre06.g253200.t1.2 | R        | Protein kinase.                                                                                                                                                                                                                                                                             |            |
| MADS2                    | 604587    | 607796   | -          | MADS2    | 251163     | 254600    | +          | 142433                  | chromosome_6:604587-607796 | Cre06.g253250.t1.2 | R        | Protein of unknown function; contains a MADS box; possible transcription factor.                                                                                                                                                                                                            |            |
| UBCH1                    | 608319    | 611626   | -          | UBCH1    | 247052     | 250463    | +          | 182375                  | chromosome_6:608314-611993 | Cre06.g253300.t1.1 | R        | Ubiquitin carboxyl-terminal hydrolase.                                                                                                                                                                                                                                                      |            |
| GCSH                     | 612287    | 613424   | +          | GCSH     | 245616     | 246753    | -          | 196067                  | chromosome_6:612078-614002 | Cre06.g253350.t1.1 | R        | Glycine decarboxylase complex, H-protein; glycine cleavage system H protein; mitochondrial.                                                                                                                                                                                                 |            |
| PR46a                    | 613965    | 614790   | +          | PR46a    | 244254     | 245075    | -          | 195751                  | chromosome_6:613946-615559 | Cre06.g253400.t1.2 | R        | Conserved protein, probable ubiquitin-fold modifier 1 precursor. Contains a Ufm1 region.                                                                                                                                                                                                    |            |
| PR46b                    | 614566    | 616026   | -          | PR46b    | 242633     | 243969    | +          | 24002                   | chromosome_6:614555-616550 | Cre06.g253400.t1.2 | R        | Protein of Unknown Function                                                                                                                                                                                                                                                                 |            |
| MT0618                   | 617958    | 619173   | +          | MT0618   | 239874     | 241080    | -          | 522889                  | chromosome_6:617958-619173 | Cre06.g253459.t1.1 | R        | Protein of Unknown Function                                                                                                                                                                                                                                                                 |            |
| 155027                   | 621009    | 621796   | +          | 155027   | 237311     | 238039    | -          | 155027                  | chromosome_6:621009-621796 | Cre06.g253459.t1.1 | R        | Protein of Unknown Function                                                                                                                                                                                                                                                                 |            |
| OTU2a                    | 624393    | 626513   | +          | OTU2     | 232321     | 234447    | -          | 155028                  | chromosome_6:624393-626513 | Cre06.g253900.t1.1 | R        | Otubain domain putative protease.                                                                                                                                                                                                                                                           |            |
| HRGP1                    | 786171    | 788252   | -          | HRGP1    | 329031     | 331111    | -          | 522903                  | chromosome_6:785455-789453 | Cre06.g254100.t1.2 | R        | Hydroxyproline-rich glycoprotein; possible cell wall component                                                                                                                                                                                                                              |            |
| UTP1                     | 789569    | 794138   | -          | UTP1     | 332079     | 336649    | -          | 195954                  | chromosome_6:789569-794291 | Cre06.g254150.t1.1 | R        | Nucleolar protein, Component of the U3 processome. WD40 repeat protein.                                                                                                                                                                                                                     |            |
| MT0796                   | 796333    | 796956   | +          | MT0796   | 338690     | 339306    | +          | None                    | chromosome_6:796333-796949 | None               | R        | Protein of Unknown Function                                                                                                                                                                                                                                                                 |            |
| MT0828                   | 828295    | 828651   | -          | MT0828   | 345010     | 345366    | -          | 167439                  | chromosome_6:828235-828651 | Cre06.g254350.t1.2 | C        | Protein of Unknown Function                                                                                                                                                                                                                                                                 |            |
| MT0829                   | 829749    | 831363   | -          | MT0829   | ND         | ND        | ND         | 522911                  | chromosome_6:828875-831773 | Cre06.g254350.t1.2 | C        | Protein of Unknown Function                                                                                                                                                                                                                                                                 |            |
| FUM1                     | 832059    | 836131   | +          | FUM1     | ND         | ND        | ND         | 195953                  | chromosome_6:831979-836593 | Cre06.g254400.t1.2 | C        | Similarity to class I prokaryotic fumarase; predicted to be mitochondrial                                                                                                                                                                                                                   |            |
| FBX9                     | 836668    | 838815   | -          | FBX9     | ND         | ND        | ND         | 522913                  | chromosome_6:836605-839603 | Cre06.g254450.t1.1 | C        | Protein of unknown function, containing cyclin-like F box, putative                                                                                                                                                                                                                         |            |
| 522914                   | 840544    | 843350   | -          | 522914   | ND         | ND        | ND         | 522914                  | chromosome_6:840255-843763 | Cre06.g254500.t1.2 | C        | Protein of Unknown Function                                                                                                                                                                                                                                                                 |            |
| 522915                   | 844306    | 844997   | +          | 522915   | ND         | ND        | ND         | 522915                  | chromosome_6:844204-845888 | Cre06.g254550.t1.1 | C        | Protein of Unknown Function                                                                                                                                                                                                                                                                 |            |
| 294742                   | 847211    | 852045   | +          | 294742   | ND         | ND        | ND         | 522916                  | chromosome_6:847211-852045 | Cre06.g254600.t1.2 | C        | Protein of Unknown Function                                                                                                                                                                                                                                                                 |            |
| 522917                   | 853364    | 855718   | -          | 522917   | ND         | ND        | ND         | 522917                  | chromosome_6:853364-855718 | None               | C        | Protein of Unknown Function                                                                                                                                                                                                                                                                 |            |
| 522918                   | 856079    | 857847   | -          | 522918   | ND         | ND        | ND         | 522918                  | chromosome_6:856005-859003 | Cre06.g254650.t1.1 | C        | Protein of unknown function, containing zinc-finger domains                                                                                                                                                                                                                                 |            |
| 522919                   | 859323    | 862240   | +          | 522919   | ND         | ND        | ND         | 522919                  | chromosome_6:859134-862538 | Cre06.g254700.t1.2 | C        | Protein of Unknown Function                                                                                                                                                                                                                                                                 |            |
| 161193                   | 862687    | 862992   | -          | 161193   | ND         | ND        | ND         | 161193                  | chromosome_6:862570-863757 | Cre06.g254750.t1.1 | C        | Protein of Unknown Function                                                                                                                                                                                                                                                                 |            |
| 196073                   | 863874    | 866894   | -          | 196073   | ND         | ND        | ND         | 196073                  | chromosome_6:863787-867288 | Cre06.g254800.t1.1 | C        | SF3B4; Subunit of the splicing factor SF3B required for 'A' complex assembly formed by the stable binding of the U2 snRNP to the branch point sequence of the pre-mRNA. Also known as SAP49                                                                                                 |            |
| 522922                   | 867943    | 876830   | -          | 522922   | ND         | ND        | ND         | 522922                  | chromosome_6:867755-878073 | Cre06.g254850.t1.2 | C        | Protein of Unknown Function                                                                                                                                                                                                                                                                 |            |
| SAD1                     | 880383    | 897375   | +          | SAD1     | ND         | ND        | ND         | 305997                  | chromosome_6:879988-897789 | Cre06.g255000.t1.1 | C        | MT- agglutinin gene; sexual adhesion protein located on the flagellar surface of minus gametes; HRGP [PMID: 15659633, Genbank entry AY450929]                                                                                                                                               |            |
| 294752                   | 906536    | 910391   | -          | 294752   | ND         | ND        | ND         | 522926                  | chromosome_6:906536-910391 | Cre06.g255050.t1.1 | C        | Protein of Unknown Function                                                                                                                                                                                                                                                                 |            |
| 344092                   | 910951    | 918193   | +          | 344092   | ND         | ND        | ND         | 344092                  | chromosome_6:910859-918193 | Cre06.g255100.t1.1 | C        | Protein of Unknown Function                                                                                                                                                                                                                                                                 |            |
| 196063                   | 921026    | 923570   | +          | 196063   | ND         | ND        | ND         | 196063                  | chromosome_6:920827-923570 | Cre06.g255200.t1.1 | C        | Protein of unknown function; contains a (hydroxy)proline rich region                                                                                                                                                                                                                        |            |
| CGLD28                   | 923951    | 930179   | -          | CGLD28   | ND         | ND        | ND         | 187252                  | chromosome_6:923789-931283 | Cre06.g255300.t1.1 | C        | Conserved protein                                                                                                                                                                                                                                                                           |            |
| THI10                    | 931565    | 933755   | +          | THI10    | ND         | ND        | ND         | 126905                  | chromosome_6:931565-934443 | Cre06.g255350.t1.1 | C        | hydroxyethylthiazole kinase (HMT Kinase, THIM), involved in thiamine biosynthesis. Mutants in this gene (THI10) are thiamine-requiring.                                                                                                                                                     |            |
| <b>MT+ Limited Genes</b> |           |          |            |          |            |           |            |                         |                            |                    |          |                                                                                                                                                                                                                                                                                             |            |
| MTP0428                  | 428272    | 432213   | -          | NA       | NA         | NA        | NA         | 167487                  | chromosome_6:428272-432213 | Cre06.g252250.t1.2 | R        | Protein of Unknown Function                                                                                                                                                                                                                                                                 |            |
| FUS1                     | 483650    | 487404   | +          | NA       | NA         | NA        | NA         | 195935                  | chromosome_6:483650-488162 | Cre06.g252750.t1.2 | R        | Glycoprotein localized to the membrane surface of the plus gamete mating structure; lacking in non-fusing fus1 mutants. The FUS1 gene exists only in the MT+ locus.                                                                                                                         |            |
| MTA5                     | 547228    | 551384   | -          | NA       | NA         | NA        | NA         | 522877                  | chromosome_6:546710-551888 | Cre06.g252930.t1.1 | R        | Predicted Protein. Part of A region duplication in the mating type plus locus                                                                                                                                                                                                               |            |
| MTA4                     | 552115    | 559822   | +          | NA       | NA         | NA        | NA         | 7933                    | chromosome_6:551994-560141 | None               | R        | Predicted protein. Part of A region duplication in the mating type plus locus                                                                                                                                                                                                               |            |
| psMTA2                   | 561462    | 562582   | -          | NA       | NA         | NA        | NA         | 305935                  | chromosome_6:561462-562582 | None               | R        | Pseudogene. Original Hydroxyproline-rich glycoprotein interrupted by MTA1. Part of A region duplication in the mating type plus locus                                                                                                                                                       |            |
| MTA1                     | 563451    | 563831   | -          | NA       | NA         | NA        | NA         | 195674                  | chromosome_6:562980-564042 | Cre06.g253000.t1.2 | R        | Protein of unknown function. mRNA is induced in plus gametes. Gene exists only in the mt+ locus [PMID: 11805055]                                                                                                                                                                            |            |
| MTA3                     | 567238    | 568053   | +          | NA       | NA         | NA        | NA         | 195822                  | chromosome_6:567034-569191 | None               | R        | Predicted Protein. Part of A region duplication in the mating type plus locus. [PMID: 11805055]                                                                                                                                                                                             |            |
| 294708                   | 577663    | 578485   | -          | NA       | NA         | NA        | NA         | 294708                  | chromosome_6:577663-578485 | Cre06.g253150.t1.1 | R        | Probable pseudogene due to 5' truncation. Part of A region duplication in the mating type plus locus                                                                                                                                                                                        |            |
| EZY2a                    | 632370    | 633903   | +          | NA       | NA         | NA        | NA         | 522890                  | chromosome_6:632370-633588 | None               | R        | Zygotically expressed gene in 16 kb repeat region [PMID 11805055]                                                                                                                                                                                                                           |            |
| INT1a                    | 648806    | 650537   | -          | NA       | NA         | NA        | NA         | 522891                  | chromosome_6:648806-650537 | Cre06.g253550.t1.1 | R        | Predicted Protein. Part of the "16kb Repeat Region"                                                                                                                                                                                                                                         |            |
| EZY2b                    | 658079    | 662115   | +          | NA       | NA         | NA        | NA         | 522892                  | chromosome_6:657099-665573 | Cre06.g253600.t1.2 | R        | Zygotically expressed gene in 16 kb repeat region [PMID 11805055]                                                                                                                                                                                                                           |            |
| INT1b                    | 668047    | 670008   | -          | NA       | NA         | NA        | NA         | 522893                  | chromosome_6:667970-670048 | Cre06.g253650.t1.1 | R        | Predicted Protein. Part of the "16kb Repeat Region"                                                                                                                                                                                                                                         |            |
| OTU2b                    | 670189    | 671942   | +          | NA       | NA         | NA        | NA         | 522894                  | chromosome_6:670189-671942 | None               | R        | Otubain domain putative protease. Part of the "16kb Repeat Region"                                                                                                                                                                                                                          |            |
| EZY2c                    | 676895    | 681300   | +          | NA       | NA         | NA        | NA         | 522895                  | chromosome_6:676895-681300 | Cre06.g253750.t1.1 | R        | Zygotically expressed gene in 16 kb repeat region [PMID 11805055]                                                                                                                                                                                                                           |            |
| EZY2d                    | 724806    | 729214   | +          | NA       | NA         | NA        | NA         | 522896                  | chromosome_6:724806-729214 | Cre06.g253950.t1.1 | R        | Zygotically expressed gene in 16 kb repeat region [PMID 11805055]                                                                                                                                                                                                                           |            |
| INT1c                    | 733883    | 735844   | -          | NA       |            |           |            |                         |                            |                    |          |                                                                                                                                                                                                                                                                                             |            |
