# Supplementary material for: Species and Population Level Molecular Profiling Reveals Cryptic Recombination and Emergent Asymmetry in the Dimorphic Mating Locus of C. reinhardtii
Source: PubMed Central journal article supplement (PMC3757049; doi:10.1371/journal.pgen.1003724), 2013-08-29
Supplement: pgen.1003724.s012.pdf [file pgen.1003724.s012.pdf]

TABLE S6

*C. reinhardtii* strains and DNA sequences used for population genetic studies

| Strain ID | Alternative name         | Geographic Origin | Mating type | Genbank accession numbers |             |            |                |             |              |             |             |                          |                          |                               |                         |
|-----------|--------------------------|-------------------|-------------|---------------------------|-------------|------------|----------------|-------------|--------------|-------------|-------------|--------------------------|--------------------------|-------------------------------|-------------------------|
|           |                          |                   |             | <i>MID</i>                | <i>MTA1</i> | <i>GP1</i> | <i>mitoDNA</i> | <i>PDK1</i> | <i>PR46b</i> | <i>SAD1</i> | <i>SPP3</i> | <i>CBLPa<sup>a</sup></i> | <i>MAT3a<sup>a</sup></i> | <i>IDA5/ACTIN<sup>a</sup></i> | <i>YPT4<sup>a</sup></i> |
| CC-277    | cw15-2                   | MA                | MT+         |                           |             |            |                |             |              |             |             | EU306630                 | EU306632                 | D50838                        | U13167                  |
| CC-620    | R3 (137c)                | MA                | MT+         |                           | AF417571    | GU002580   | GU002593       | GU002606    | GU002619     | GU002632    | GU002645    |                          |                          |                               |                         |
| CC-1373   | <i>C. smithii</i>        | MA                | MT+         |                           | DQ364190    | GU002581   | GU002594       | GU002607    | GU002620     | GU002633    | GU002646    | EU306625                 | EU306633                 | U70571                        | U55911                  |
| CC-2343   | Jarvik 124               | PA                | MT+         |                           | DQ364191    | GU002582   | GU002595       | GU002608    | GU002621     | GU002634    | GU002647    | EU306628                 | EU306636                 | U70561                        | U55889                  |
| CC-2344   | Jarvik 356               | FL                | MT+         |                           | DQ364192    | GU002583   | GU002596       | GU002609    | GU002622     | GU002635    | GU002648    | EU306629                 | EU306637                 | U70562                        | U55891                  |
| CC-2932   | Harris 10                | NC                | MT+         |                           | DQ364193    | GU002584   | GU002597       | GU002610    | GU002623     | GU002636    | GU002649    |                          |                          |                               |                         |
| CC-2936   | -                        | QC                | MT+         |                           | DQ364194    | GU002585   | GU002598       | GU002611    | GU002624     | GU002637    | GU002650    |                          |                          |                               |                         |
| CC-2937   | -                        | QC                | MT+         |                           | DQ364195    | GU002586   | GU002599       | GU002612    | GU002625     | GU002638    | GU002651    |                          |                          |                               |                         |
| CC-621    | NO (137c)                | MA                | MT-         | U92071                    |             | GU002587   | GU002600       | GU002613    | GU002626     | GU002639    | GU002652    |                          |                          |                               |                         |
| CC-1952   | <i>C. grossii</i> , S1C5 | MN                | MT-         | DQ355810                  |             | GU002588   | GU002601       | GU002614    | GU002627     | GU002640    | GU002653    | EU306626                 | EU306634                 | U70563                        | U55893                  |
| CC-2342   | Jarvik 6                 | PA                | MT-         | DQ355811                  |             | GU002589   | GU002602       | GU002615    | GU002628     | GU002641    | GU002654    | EU306627                 | EU306635                 | U70569                        | U55905                  |
| CC-2931   | Harris 6                 | NC                | MT-         | DQ355812                  |             | GU002590   | GU002603       | GU002616    | GU002629     | GU002642    | GU002655    | EU306624                 | EU306631                 | U70568                        | U55901                  |
| CC-2935   | -                        | QC                | MT-         | DQ355808                  |             | GU002591   | GU002604       | GU002617    | GU002630     | GU002643    | GU002656    |                          |                          |                               |                         |
| CC-2938   | -                        | QC                | MT-         | DQ355809                  |             | GU002592   | GU002605       | GU002618    | GU002631     | GU002644    | GU002657    |                          |                          |                               |                         |

*Chlamydomonas* Resource Center (<http://chlamycollection.org/>) strain numbers are listed along with common laboratory names for selected strains. Geographic origins are abbreviated as follows: FL, Florida; MA, Massachusetts; MN, Minnesota; NC, North Carolina; PA, Pennsylvania; QC, Quebec, Canada. Genbank accession numbers are listed for genes in each isolate. a. Data from [37]
