# Supplementary material for: Species and Population Level Molecular Profiling Reveals Cryptic Recombination and Emergent Asymmetry in the Dimorphic Mating Locus of C. reinhardtii
Source: PubMed Central journal article supplement (PMC3757049; doi:10.1371/journal.pgen.1003724), 2013-08-29
Supplement: pgen.1003724.s014.pdf [file pgen.1003724.s014.pdf]

**TABLE S8**  
**Recombination data for *MT+* homozygous cross.**

|                | Nic | NIC7 | PDK1 | MTA1 | PR46a | SAD1 | Thi | MAT3 | MMP1 | YPT4 | GP1 |
|----------------|-----|------|------|------|-------|------|-----|------|------|------|-----|
| <b>Parents</b> |     |      |      |      |       |      |     |      |      |      |     |
| K33            | -   | K33  | K33  | K33  | K33   | K33  | -   | K33  | K33  | K33  | K33 |
| CC-2344        | +   | 356  | 356  | 356  | 356   | 356  | +   | 356  | 356  | 356  | 356 |
| <b>Progeny</b> |     |      |      |      |       |      |     |      |      |      |     |
| BA17           | +   | 356  | nd   | nd   | nd    | 356  | -   | K33  | K33  | 356  | K33 |
| BA23           | -   | K33  | K33  | 356  | nd    | 356  | +   | 356  | 356  | K33  | K33 |
| BA25           | -   | K33  | nd   | nd   | nd    | K33  | +   | 356  | K33  | K33  | K33 |
| BB22           | +   | 356  | 356  | 356  | K33   | K33  | -   | K33  | 356  | K33  | 356 |
| BB25           | -   | K33  | nd   | nd   | nd    | K33  | +   | 356  | K33  | K33  | K33 |
| BC10           | -   | K33  | nd   | nd   | nd    | K33  | +   | 356  | 356  | K33  | 356 |
| BC29           | +   | 356  | nd   | nd   | nd    | 356  | -   | K33  | 356  | K33  | 356 |
| BC43           | -   | K33  | nd   | nd   | nd    | K33  | +   | 356  | 356  | K33  | 356 |
| BD23           | -   | K33  | K33  | K33  | 356   | 356  | +   | 356  | K33  | K33  | K33 |
| BD25           | -   | K33  | K33  | K33  | K33   | 356  | +   | 356  | 356  | K33  | 356 |
| BF27           | +   | 356  | nd   | nd   | nd    | 356  | -   | K33  | 356  | K33  | K33 |
| BF30           | -   | K33  | nd   | nd   | nd    | K33  | +   | 356  | 356  | 356  | K33 |
| BF39           | +   | 356  | 356  | K33  | nd    | K33  | -   | K33  | 356  | 356  | K33 |
| BG7            | +   | 356  | 356  | K33  | nd    | K33  | -   | K33  | K33  | 356  | 356 |
| BH14           | +   | 356  | nd   | nd   | nd    | 356  | -   | K33  | K33  | K33  | 356 |
| BH29           | -   | K33  | nd   | nd   | nd    | K33  | +   | 356  | K33  | 356  | 356 |
| BH39           | -   | K33  | nd   | nd   | nd    | K33  | +   | 356  | 356  | 356  | K33 |

Parental strains K33 and CC-2344 (both *MT+*), were crossed and progeny that showed recombination between NIC7 and THI10 were scored for additional markers in the indicated genes. The first 8 markers are in *MT* and listed in the order they occur on chromosome 6. MMP1, YPT4 and GP1 are unlinked to *MT* and were used as controls to show independent assortment of autosomal markers in the cross. Nic and Thi represent auxotrophy (-) or prototrophy (+) for nicotinamide or thiamine respectively.
