# Supplementary material for: Species and Population Level Molecular Profiling Reveals Cryptic Recombination and Emergent Asymmetry in the Dimorphic Mating Locus of C. reinhardtii
Source: PubMed Central journal article supplement (PMC3757049; doi:10.1371/journal.pgen.1003724), 2013-08-29
Supplement: pgen.1003724.s015.pdf [file pgen.1003724.s015.pdf]

**TABLE S9****Recombination data for *MT*- x *MT*- progeny**

| Linked Markers   | Chromosome       | Recombinants <sup>1</sup> |          | Measured cM |
|------------------|------------------|---------------------------|----------|-------------|
|                  |                  | expected <sup>2</sup>     | observed |             |
| <i>MID-NIC7</i>  | VI ( <i>MT</i> ) | 14/600                    | 0/600    | 0           |
| <i>MAT3-PDK1</i> | VI ( <i>MT</i> ) | 3/146                     | 0/146    | 0           |
| <i>4121-MT</i>   | VI               | 27/96                     | 26/96    | 27          |
| <i>GAR1-GSAT</i> | III              | 20/96                     | 20/96    | 21          |

1. recombinant progeny/total progeny. 2. Expected recombinants for *MID-NIC7* and *MAT3-PDK1* is based on the genome-wide average of ~1 cM/100 kb. For *4121-MT* (mating type) and *GAR1-GSAT* the expected value is based on published data [49].
